# Supplementary figures and images for: Electronic health record for elderly patients
Source: publisher site journal article supplement (doi:10.1515/bams-2017-0021), 2017-11-15

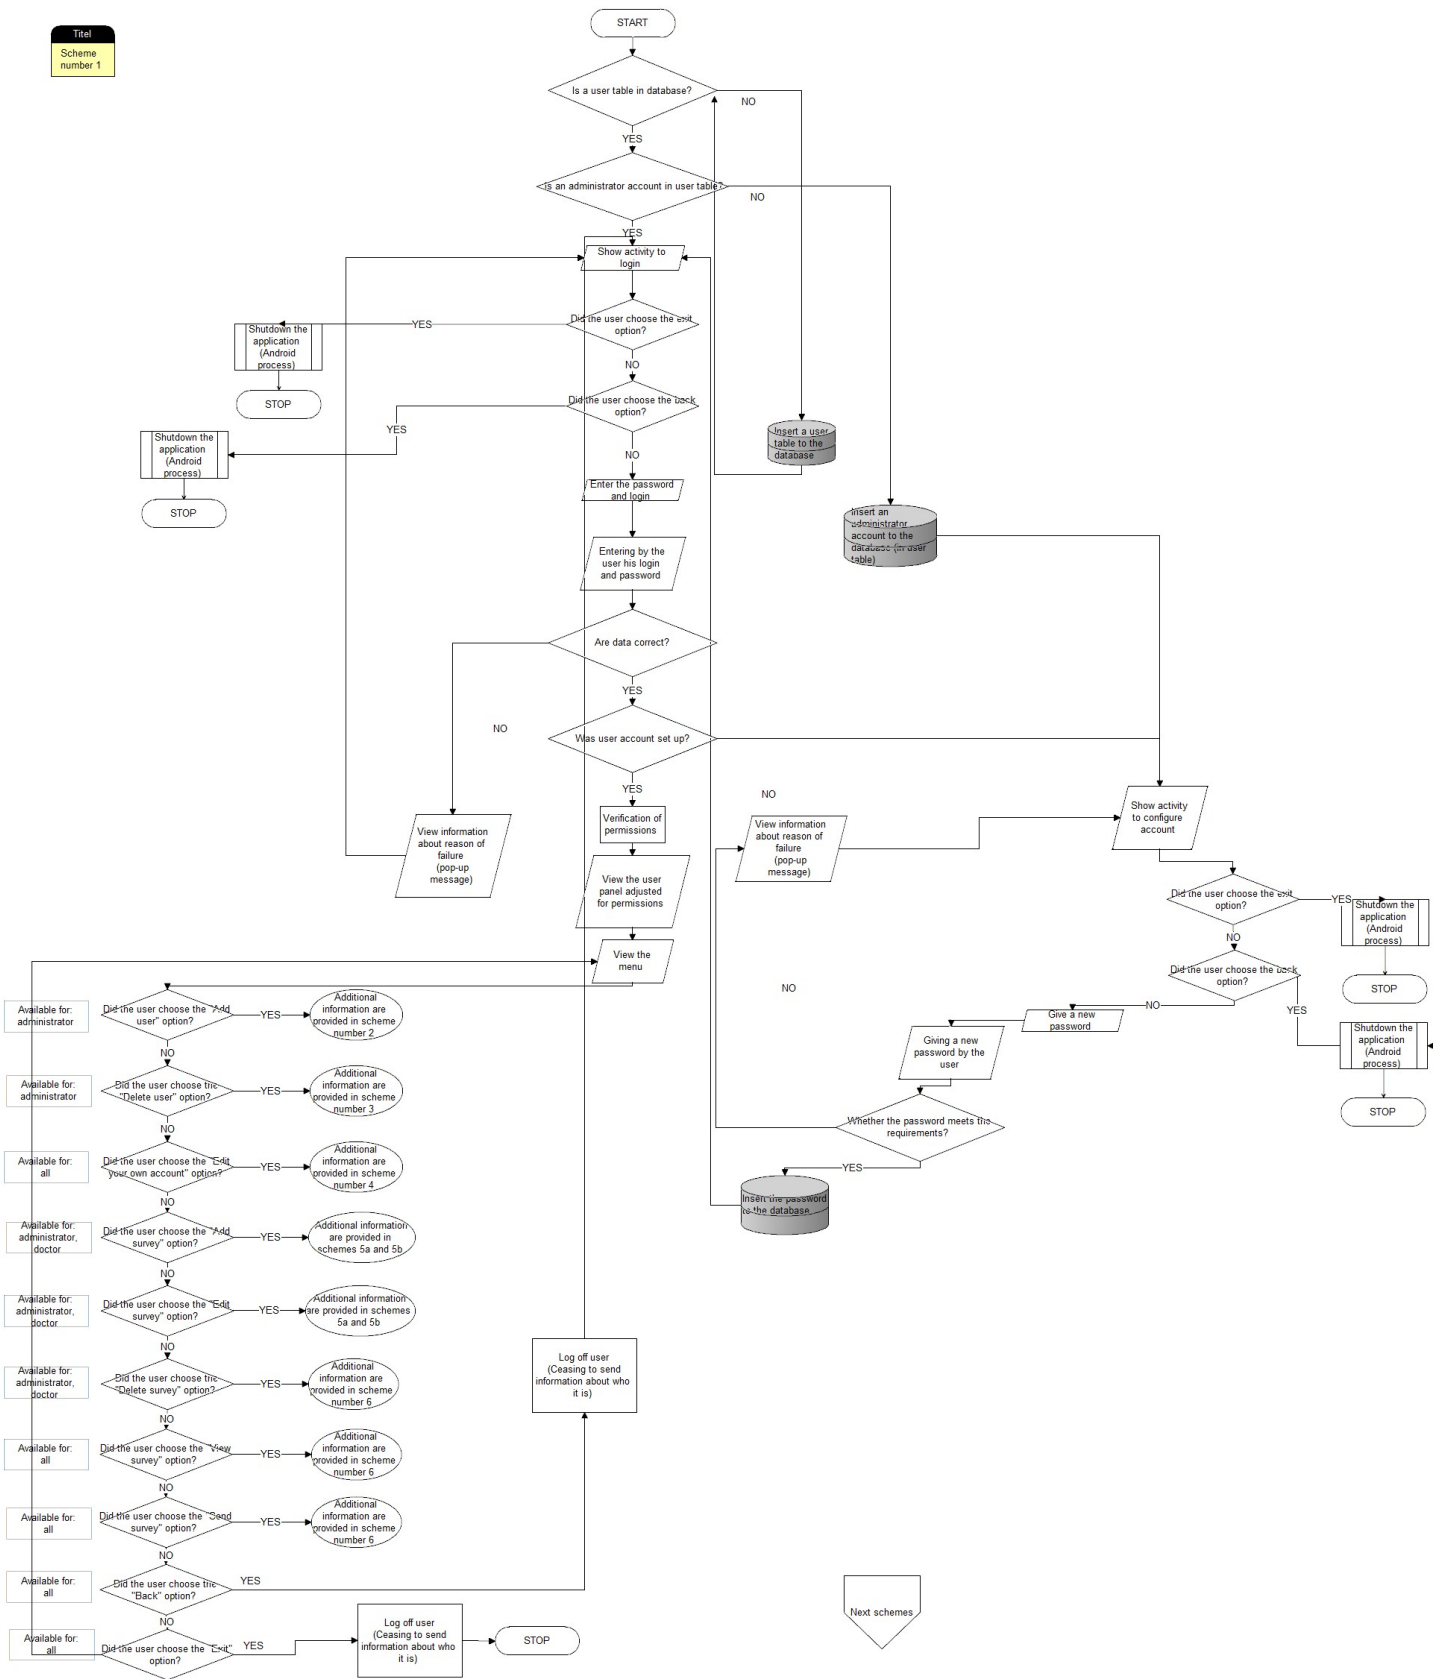

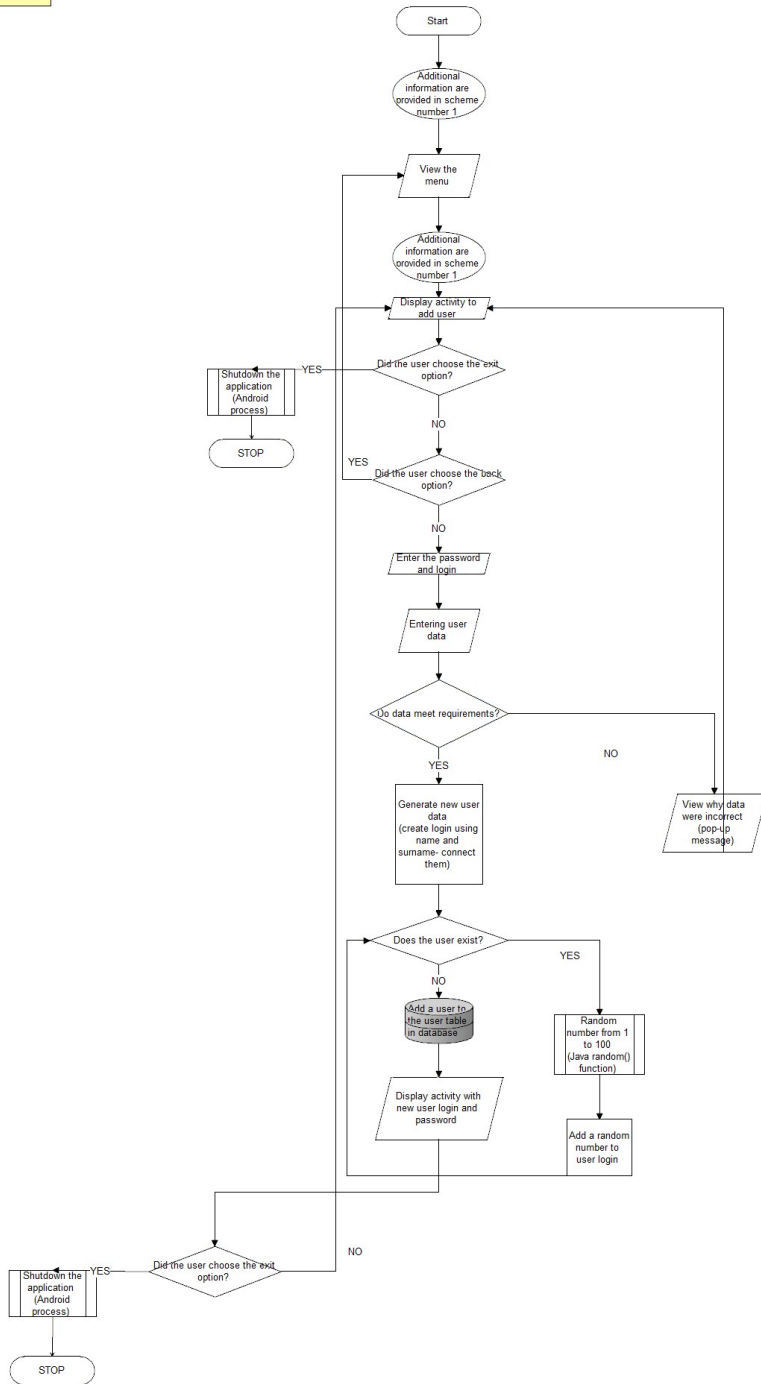

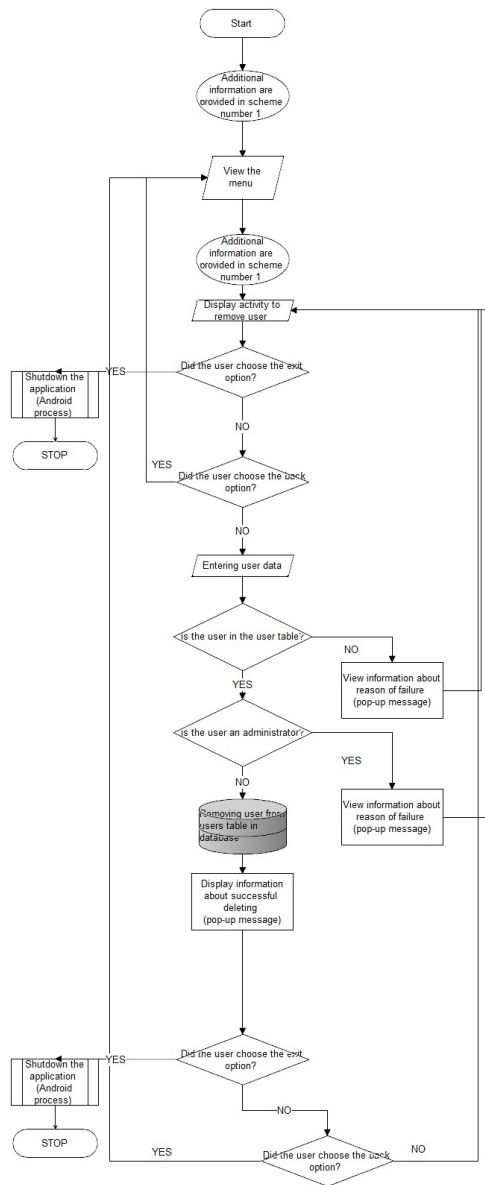

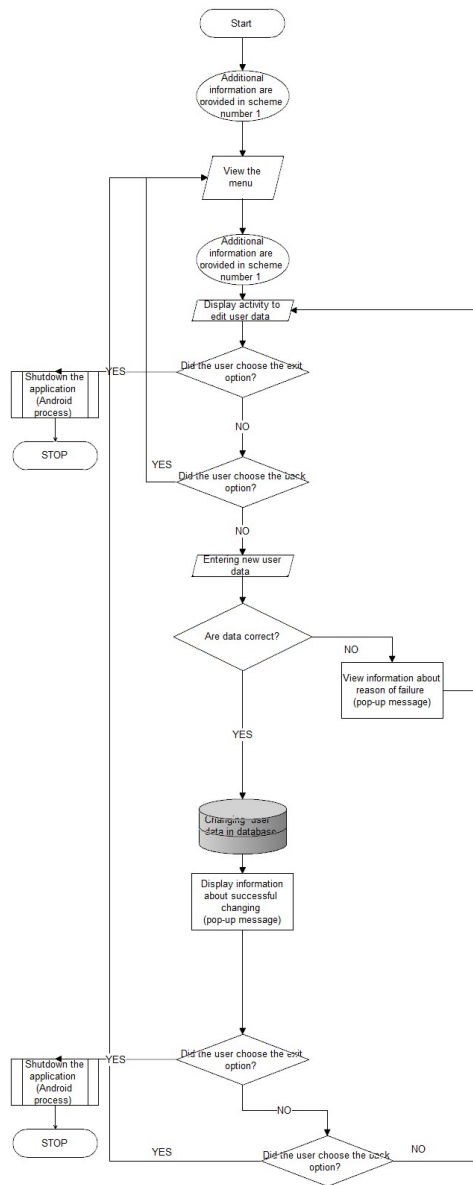

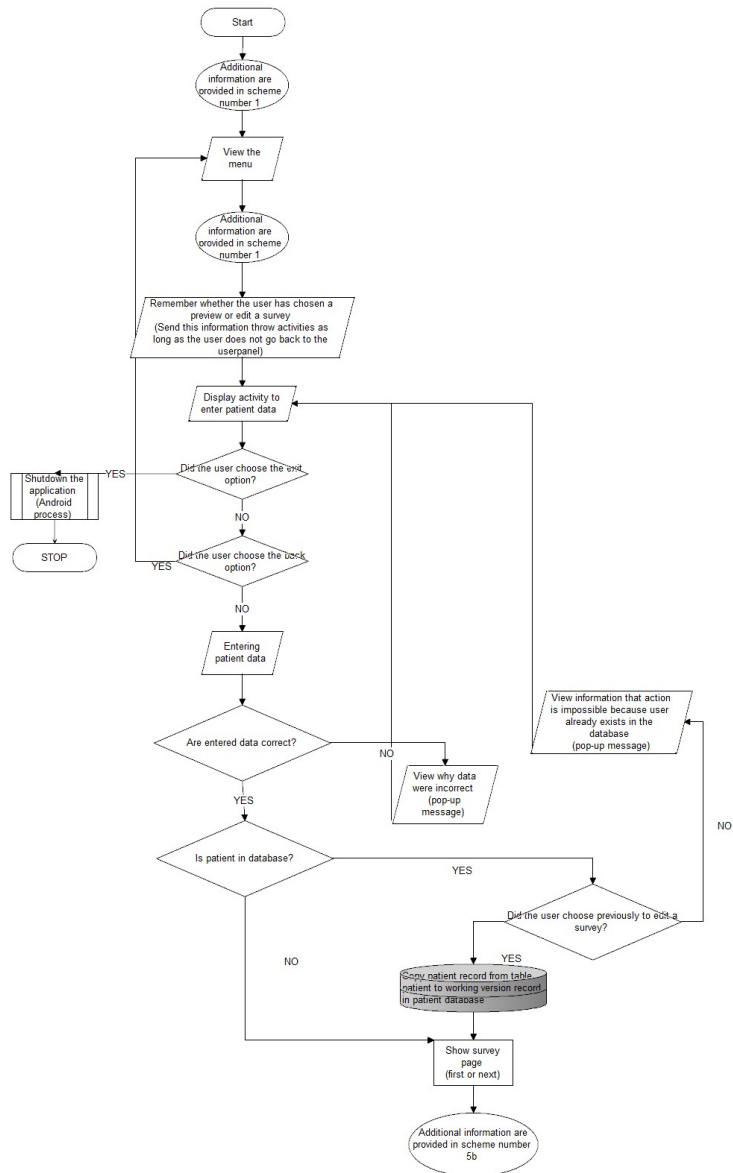

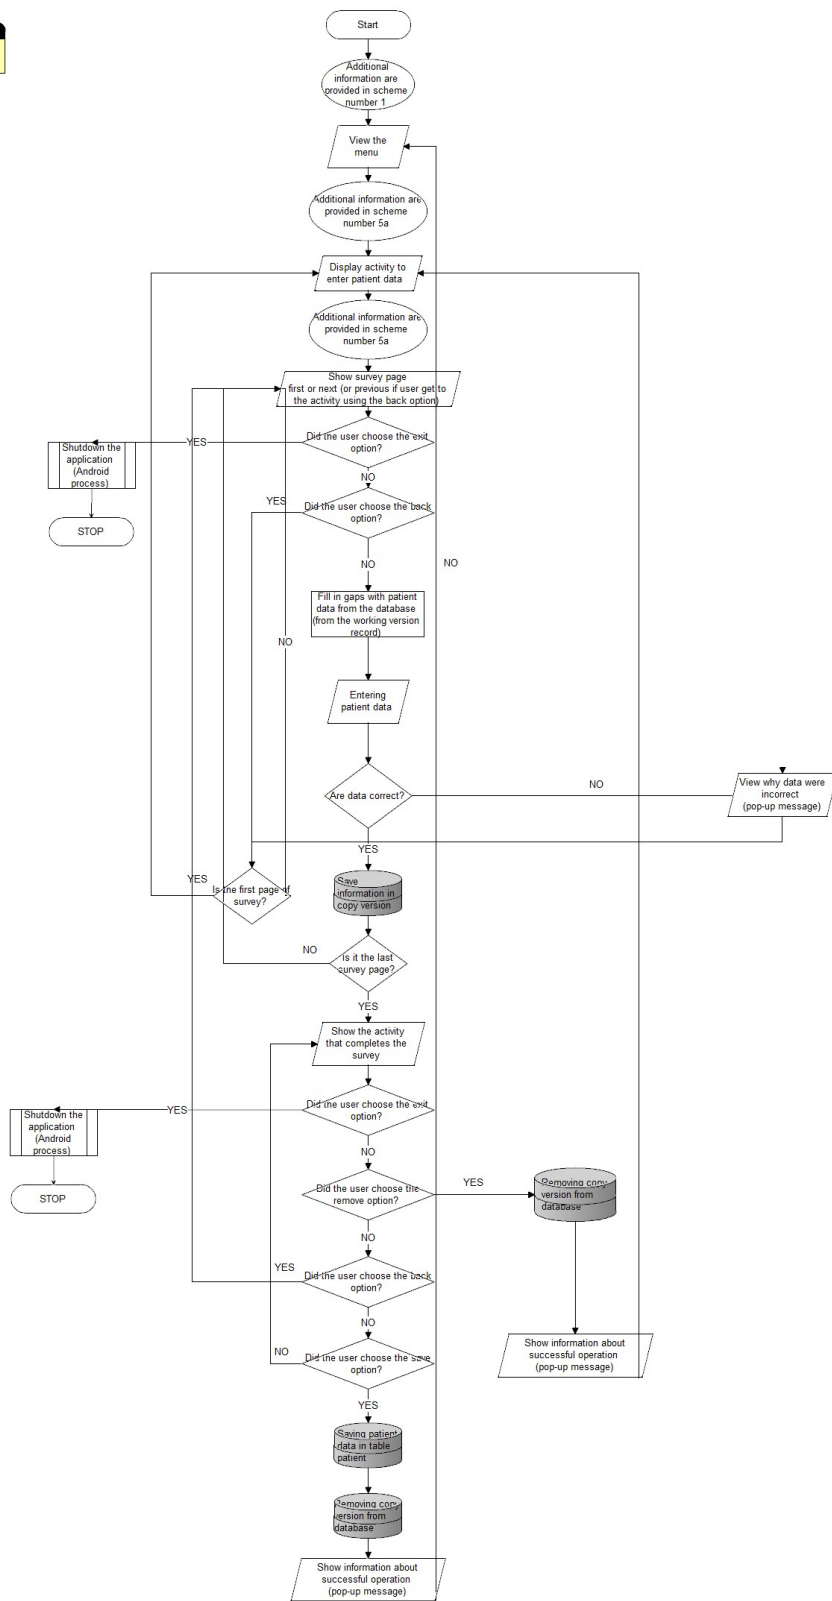

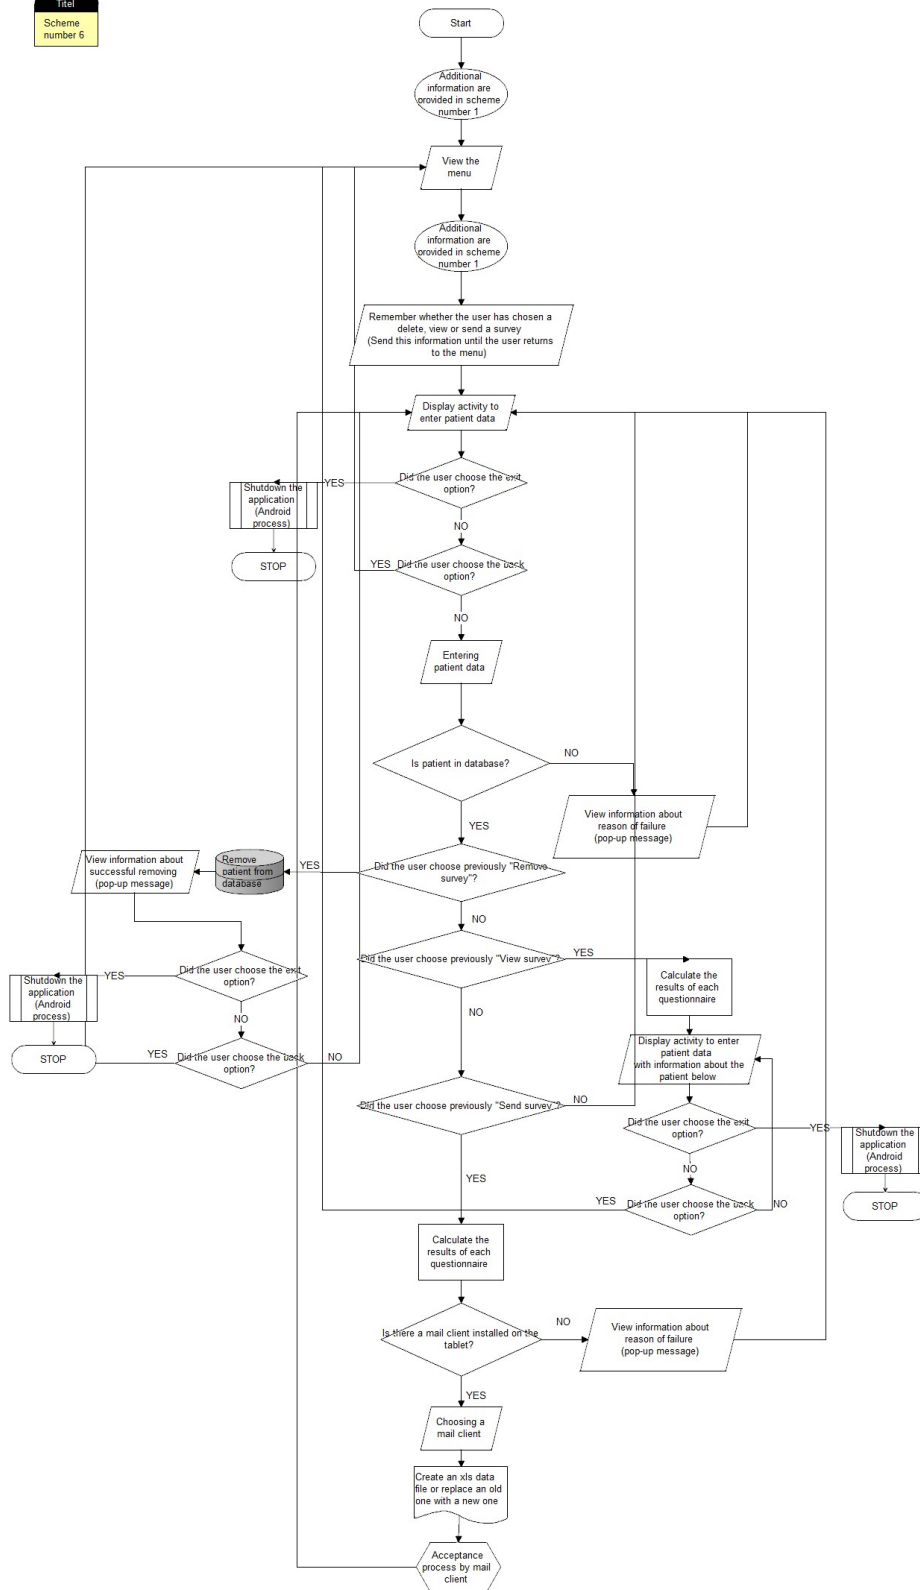

Supplement: Supplementary file 1 [file bams-2017-0021_suppl.pdf]
